# Supplementary material for: The effect of slope aspect on vegetation attributes in a mountainous dry valley, Southwest China
Source: PubMed Central journal article supplement (PMC7536199; doi:10.1038/s41598-020-73496-0), 2020-10-05
Supplement: 41598_2020_73496_MOESM1_ESM.pdf [file 41598_2020_73496_MOESM1_ESM.pdf]

# The effect of slope aspect on vegetation attributes in a mountainous dry valley, Southwest China

Jie Yang<sup>1\*</sup>, Yousry A. El-Kassaby<sup>2\*</sup>, Wenbin Guan<sup>1\*</sup>

<sup>1</sup> School of Ecology and Nature Conservation, Beijing Forestry University, Beijing, China

<sup>2</sup> Department of Forest and Conservation Sciences, Faculty of Forestry, University of British Columbia, Vancouver, BC, Canada

## Supplementary material:

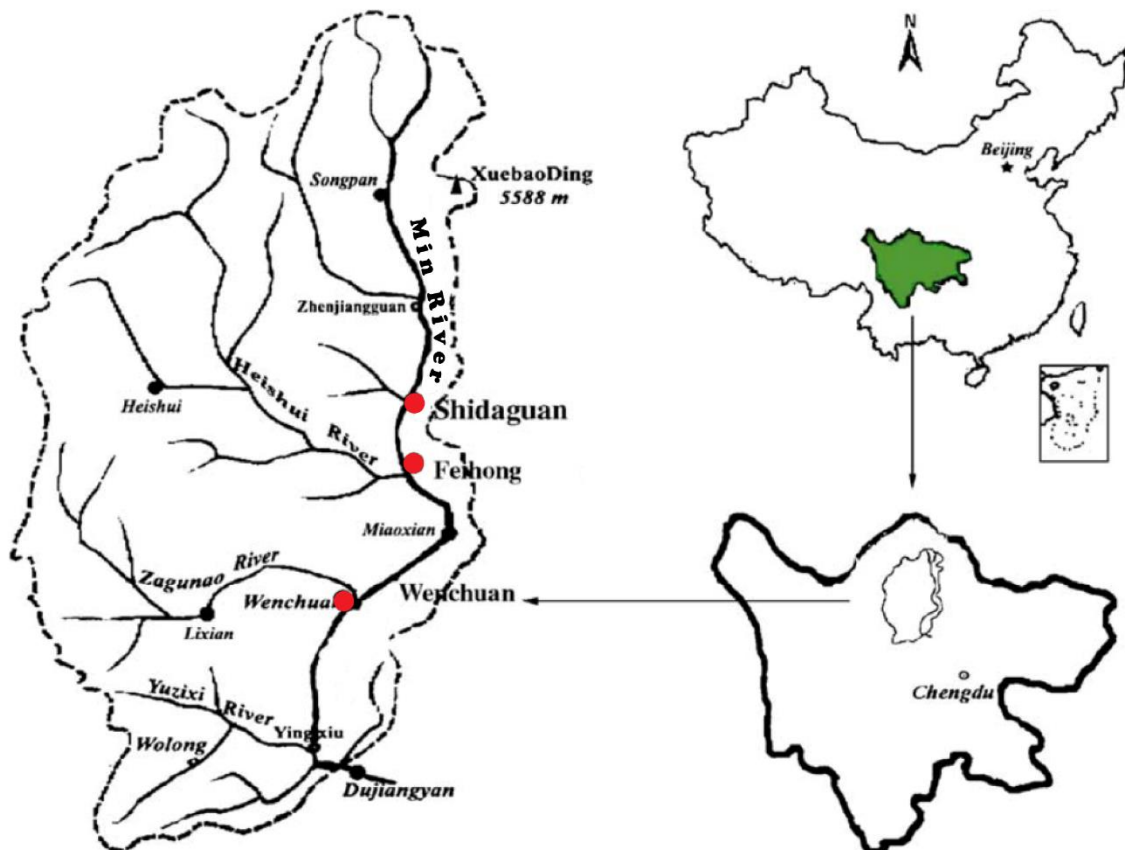

Figure S1. Location of sampling sites along the dry valley in the upper reaches of Min River (modified from Lu *et al.*<sup>1</sup>).

1 Lu, T., Ma, K. M., Zhang, W. H. & Fu, B. J. Differential responses of shrubs and herbs present at the Upper Minjiang River basin (Tibet Plateau) to several soil variables. *Journal of Arid Environments* **67**, 373-390, doi:10.1016/j.jaridenv.2006.03.011 (2006).
